# Supplementary material for: Assembly of a twin-cage complex containing a linear array of Pd3 †
Source: Royal Society of Chemistry journal article supplement (doi:10.1039/b101691l), 2001-01-01
Supplement: b101691l.doc [file b101691l.doc]

Figure 1S. Structure of 1,3-bis(imidazole-1-yl-methyl)-2,4,6-trimethylbenzene (bitmb), the hexafluorophosphate anions were omitted for clarity.

Figure 2S. View of an 1D chain along the *x*-axis with C-HCl hydrogen bonding indicated by dashed lines.
